# Supplementary material
Source: PubMed Central journal article supplement (PMC3128915)
Supplement: emm-43-367-s001.pdf [file emm-43-367-s001.pdf]

## Supplemental Data

Figure S1. CAD model of the bioreactor.

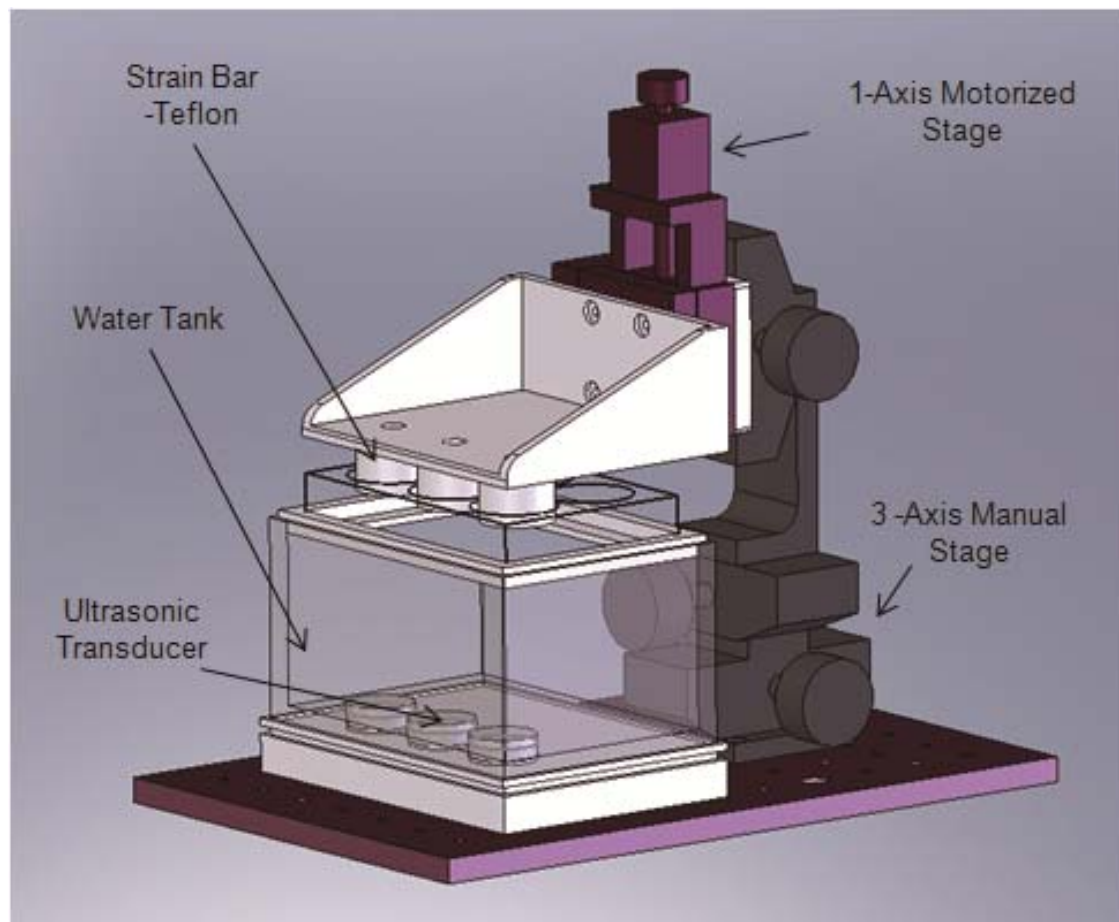

Figure S2.

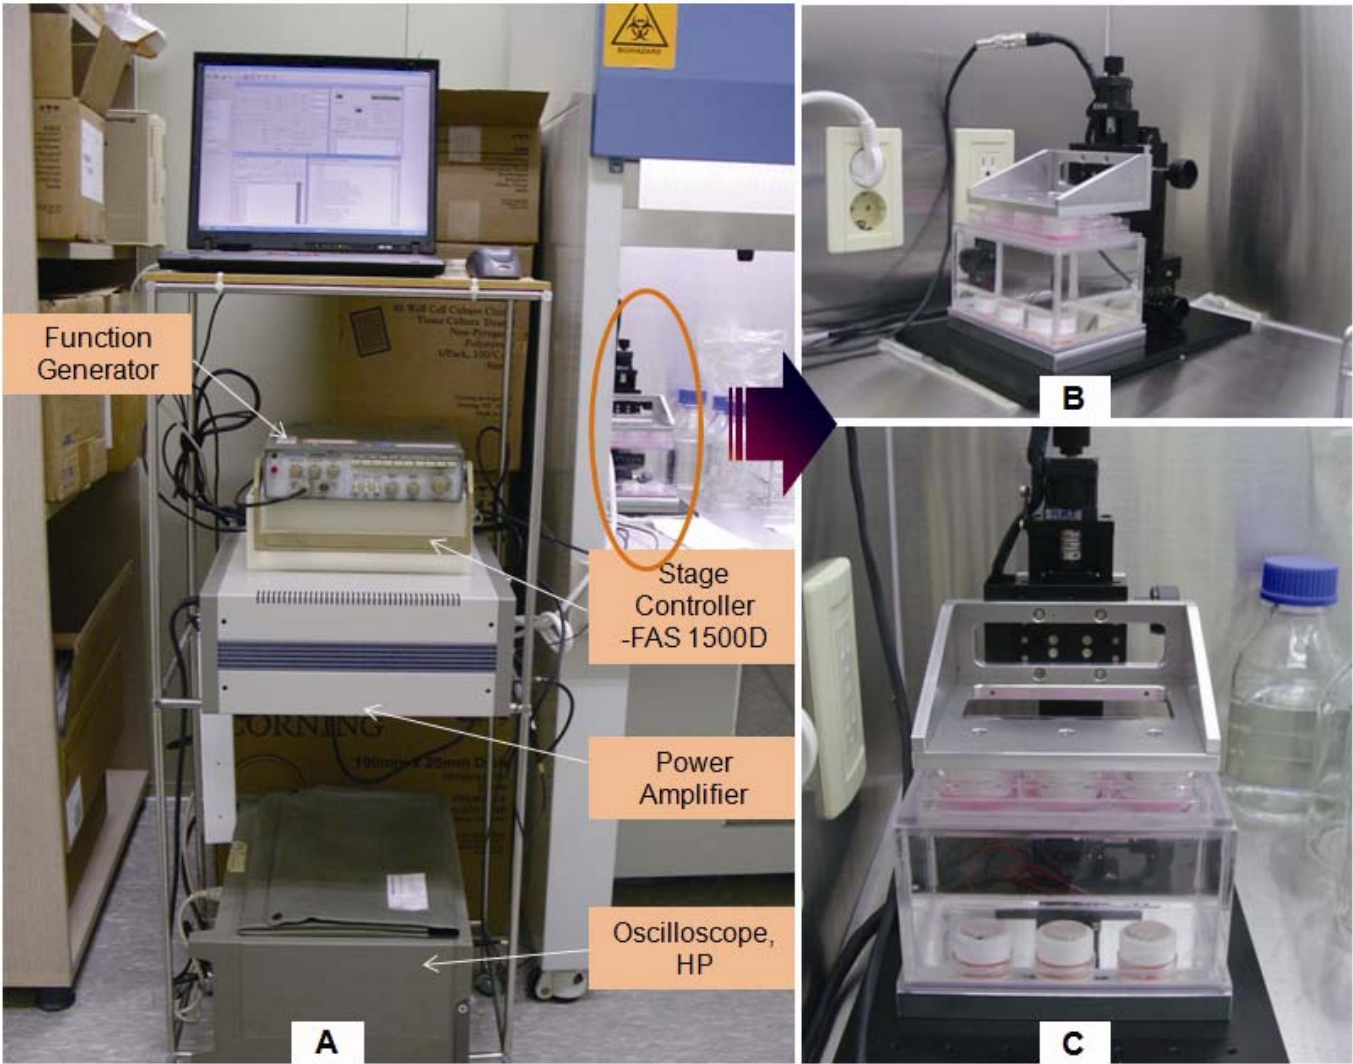

Figure S3.

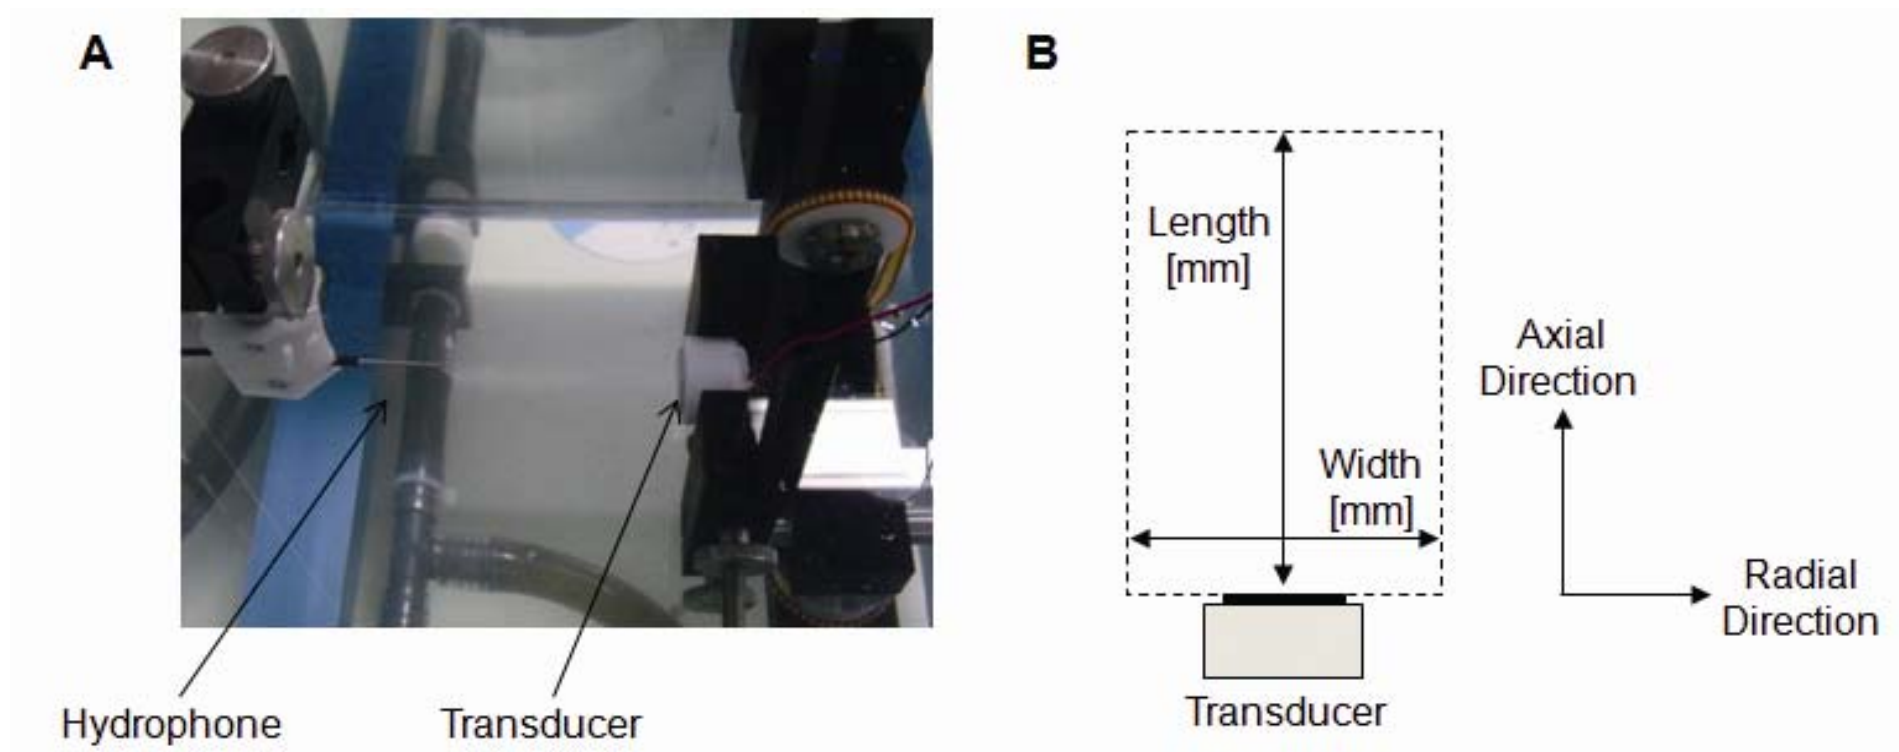

Figure S4.

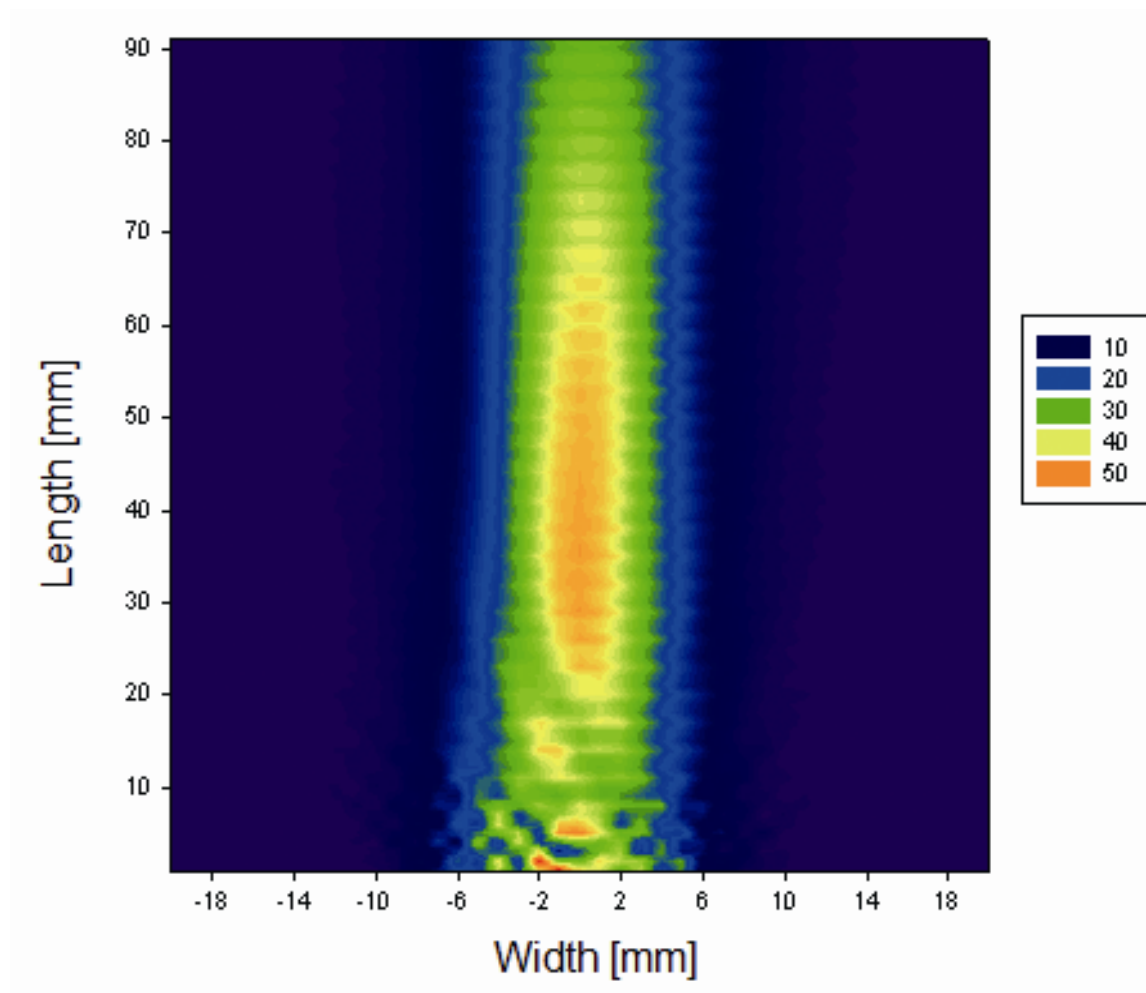

Figure S5.

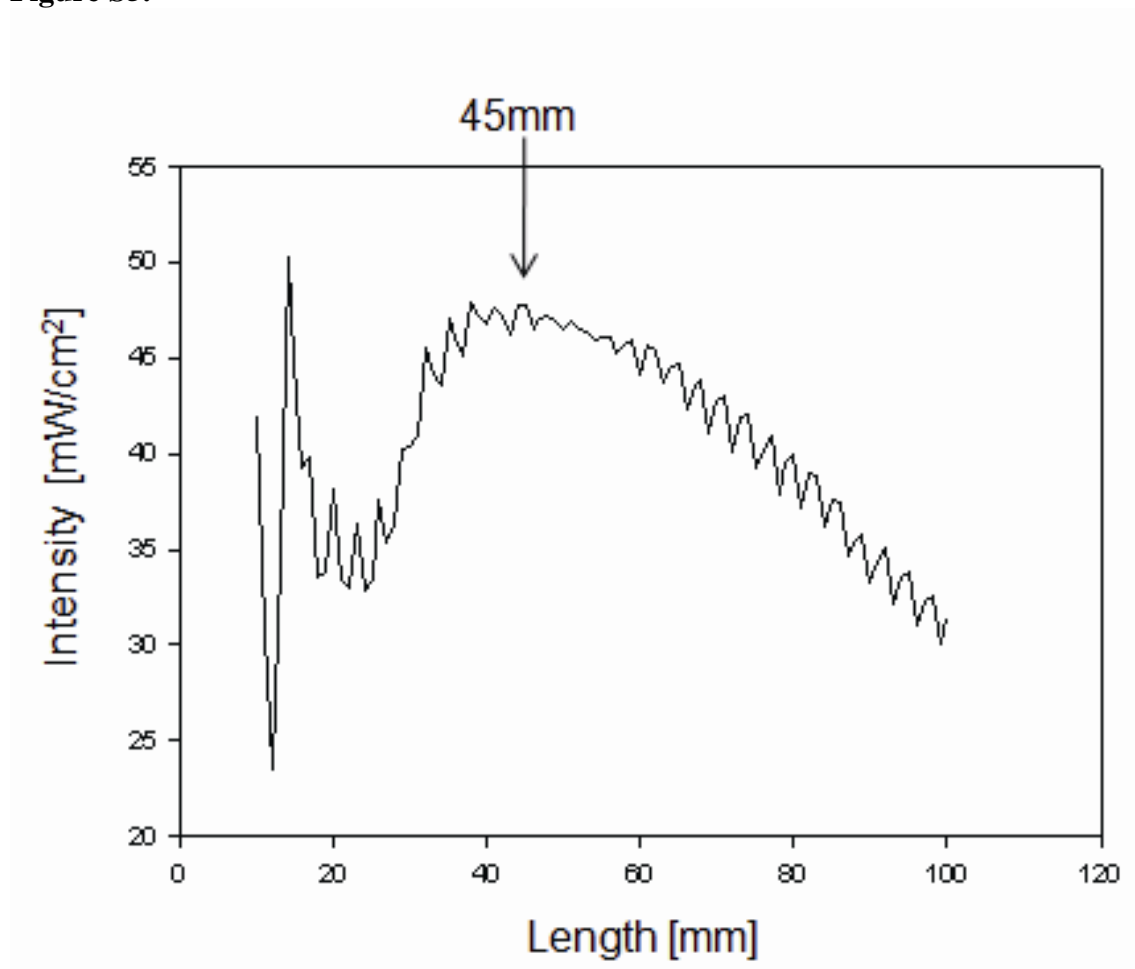

**Table S1.** Test groups according to the type of mechanical stimuli.

| Condition | Stimulation type                                    |
|-----------|-----------------------------------------------------|
| U         | Ultrasound                                          |
| U+C       | Combined stimulation (ultrasound and cyclic strain) |
| C         | Cyclic strain                                       |
| CN        | Control (no stimulation)                            |

**Table S2.** Sequences of oligonucleotide primers for RT-PCR.

| Gene                                             | Fragment size (bp) | Oligonucleotides                                                         |
|--------------------------------------------------|--------------------|--------------------------------------------------------------------------|
| OC<br>(NM 001032298.2)                           | 276                | F: 5'-ATGAGGACCCTCTCTCTGCTCACT-3'<br>R: 5'-ACCGTAGATGCGTTTGTAGGC-3'      |
| OC<br>(for real-time PCR)<br>(NM 001032298.2)    | 81                 | F: 5'-CCGGGAGCAGTGTGAGCTTA-3'<br>R: 5'-TAGATGCGTTTGTAGGCGGTC-3'          |
| COL-I<br>(NM 007742.3)                           | 312                | F: 5'-GAAGTCAGCTGCATACAC-3'<br>R: 5'-AGGAAGTCCAGGCTGTCC-3'               |
| COL-I<br>(for real-time PCR)<br>(NM 007742.3)    | 83                 | F: 5'-GCATGGCCAAGAAGACATCC-3'<br>R: 5'-CCTCGGGTTTCCACGTCTC-3'            |
| GAPDH<br>(XM 001476707.1)                        | 983                | F: 5'-TGAAGGTCGGTGTGAACGGATTTGGC-3'<br>R: 5'-CATGTAGGCCATGAGGTCCACCAC-3' |
| GAPDH<br>(for real-time PCR)<br>(XM 001476707.1) | 151                | F: 5'-GCACAGTCAAGGCCGAGAAT-3'<br>R: 5'-GCCTTCTCCATGGTGGTGAA-3'           |
| RUNX2<br>(for real-time PCR)<br>(NM 009820.4)    | 67                 | F: 5'-AAATGCCTCCGCTGTTATGAA-3'<br>R: 5'-GCTCCGGCCCACAAATCT-3'            |
| OSX<br>(for real-time PCR)<br>(NM 130458.3)      | 85                 | F: 5'-CCCTTCTCAAGCACCAATGG-3'<br>R: 5'-AGGGTGGGTAGTCATTTGCATAG-3'        |
